# Supplementary material for: Investigation and assessment of supplied water quality in RajshahiCity Corporation of Bangladesh
Source: Copernicus journal article supplement (doi:10.5194/dwes-2020-31), 2021-01-13
Supplement: Supplementary file [file dwes-2020-31-RC1-supplement.pdf]

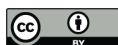

# Investigation and assessment of supplied water quality in Rajshahi City Corporation of Bangladesh

Saleha Akhter Poly<sup>1</sup>, Arif Hasnat<sup>1</sup>, Hasib Imran Tusher<sup>1</sup>, H. M. Rasel<sup>1</sup>

<sup>1</sup>Department of Civil Engineering, Rajshahi University of Engineering & Technology, Rajshahi, Bangladesh

Correspondence to: Hasib Imran Tusher (imranhasibce99ruet15@gmail.com)

**Abstract.** This paper has investigated the extensive implementation of distinct types of pipes in the Water Distribution System (WDS) and evaluated the impacts of particular leachable organic chemicals and bacteriological issues. Besides, the paper inspects significant water quality parameters like the population of Rajshahi City, Bangladesh relies on water provided via pipes for drinking and other domestic purposes. This study aims to assess the quality of physical, chemical, and microbiological parameters of supplied drinking water through lines in Rajshahi City Corporation (RCC) by Rajshahi Water Supply and Sewerage Authority (RWASA). Therefore, the study managed sixteen physical, chemical, and microbiological parameters to analyse them in the laboratory. The experimental results showed that all samples' pH and hardness were within the allowable limit as per Bangladesh Drinking Water Standards (BDWSs) and World Health Organization (WHO). All models contained an extreme level of iron and manganese. They also included a negligible amount of arsenic. The experiment detected lesser Dissolved Oxygen (DO), Residual Chlorine (Residual Cl), and the undesirable odour in about 90 % samples. All samples contained Total Coliform (TC) and *Escherichia coli* (*E. coli*) bacteria. A few samples contained a significant amount of turbidity, Chemical Oxygen Demand (COD), Biological Oxygen Demand (BOD), and Electrical Conductivity (EC). The authors developed a statistical analysis by SPSS software to co-relate the parameters. This study recommends the presence of such bacteria, iron, and manganese in the pipeline.

**Keywords.** Water quality, Investigation, Physical parameters, Chemical parameters, Microbiological parameters, Health risks

## 1 Introduction

Good quality of drinking water is one of the critical components of human physiology (Etim et al., 2013). So, water is one of the essential substances for sustaining life, health, and preserving ecosystems (Cabral, 2010; AL-Dulaimi and Younes, 2017). However, ensuring safe drinking water with adequate quantity to the consumers is the major challenge in the last decades. Because, water demand, as well as water degradation, have been rising due to the growing population, land exploitation, overexploitation of groundwater and economic development in the last century (Chalchisa et al., 2017; Kumar et al., 2017; Lee et al., 2018; Robinne et al., 2018). Developing countries use improved drinking water (improved water supply) sources as an alternate option to mitigate and fulfil the consumers' water demand.

Rajshahi Water Supply and Sewerage Authority (RWASA) was established in 2012 as an improved water source to overcome the water crisis due to the population increase in Rajshahi City Corporation (RCC). RWASA provides water to the



40 40 % households of the city. Currently, RWASA faces improving the quality of supplied water to the customers, as RWASA could not serve water satisfactorily to its consumers. People found blackish and reddish water due to high-level manganese and iron and complained about water quality ~~during the field survey~~. The supplied water by RWASA contains physical, chemical, and microbiological parameters apart from the presence of manganese and iron. However, field specialists have not studied these parameters.

45 Nowadays, the water quality problem is one of the most significant problems in developing countries like Bangladesh (Akoto et al., 2017). Again, drinking water is a potential ~~vehicle of exposure to both~~ physical and chemical contaminants. The contaminants may occur naturally or artificially (Fernández-Navarro et al., 2017). Liu et al. (2017c) inspected many potentially leachable substances from pipes with the widespread application of different categorical pipes in Drinking Water Distribution Systems (DWDSs). Contaminants can enter into the Water Distribution System (WDS) due to human activity (Anthropogenic contaminants), locally available materials (Natural contaminants like Fe, Mn, and As), and pharmaceuticals (Benson et al., 2017; Liu et al., 2017a). Additionally, the intermittent water supply system is another major cause to degrade water quality 50 (Agathokleous and Christodoulou, 2016; Erickson et al., 2017; Vairavamorthy et al., 2007). The first one is the treatment process from Anthropogenic contaminants, including coagulation-flocculation, disinfection, disinfection by-products, filtration, adsorption, and sedimentation. Such processes produce contaminants. As a result, they incorporate with supplied water. The second type contaminants (Zinc or Cadmium) incorporate with drinking water ~~during~~ distribution and storage.

55 Poorly designed, constructed, and operated water systems deteriorate the water quality in the distribution system resulting in consumer complaints (Doull et al., 1982). Source water, supply infrastructure, and the supply system's operation influence the formation of biofilm in DWDSs (Douterelo et al., 2016). It is unnecessary to say that biofilms alter and degrade water quality (Liu et al., 2017b). **Biofilm influences to increase bacterial counts or regrowth in the distribution system resulting from detachment of bacteria from the biofilm, reduce Dissolved Oxygen (DO) content resulting from microbial activity in the biofilm, taste and odour changes resulting from products of microbial metabolism within the biofilm, red water resulting from** 60 **the activity of iron bacteria and increased hydraulic roughness.** From another literature review, pipe materials (Wang et al., 2018), type of surface materials, the interaction between the disinfectants (Zhang et al., 2017), hydrodynamics, water temperatures, and residual disinfectants are ~~the~~ factors to influence the biofilm formation, ~~taste, and odour~~ (Zhou et al., 2017).

65 The study collected fifty-six water samples based upon public objections from fourteen wards out of thirty wards to investigate the harmful contaminants. The authors performed the analysis of physical, chemical, and microbiological parameters like pH, turbidity, Electrical Conductivity (EC), hardness, heavy metals (Iron, Arsenic, and Manganese), DO, odour, temperature, Chemical Oxygen Demand (COD), Biological Oxygen Demand (BOD), Residual Chlorine (Residual Cl), *Escherichia coli* (*E.coli*), and Total Coliform (TC) in the laboratory ~~following the standard procedures. Nevertheless, the experimental results were not satisfactory.~~ **Investigating public opinion and lab tests, the concentration of manganese and iron** 70 **was extreme.** Arsenic presented in water in a negligible amount. Other targeted parameters deviated from the World Health Organization (WHO) standards and Bangladesh Drinking Water ~~standards~~ (BDWSs) in some samples. Even the microbiological parameters did not give a satisfactory report. Elevated concentration of manganese, iron and their consumption in extreme amount cause severe health problems (Memon et al., 2011).

75 The authors also checked the essential physical and chemical parameters to understand the significance of local consumers' water quality issues. This study aims to measure the deterioration of water quality flowing from sources to the consumers. This knowledge will be more useful for the professionals of water quality sectors and use as a reference for the city's drinking water quality. Furthermore, the study attempts to help the RCC and RWASA delivering salient information regarding the present quality of supplied water in the city and make them cautious of supplying good quality water.

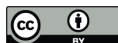

## 2 Research methodology

### 80 2.1 Description of the sampling site

RCC is one of the twelve city corporations, located in the north-west part of Bangladesh. It lies between  $24^{\circ} 21'$  and  $24^{\circ} 26'$  N latitude and between  $88^{\circ} 28'$  and  $88^{\circ} 37'$  E longitude. The city is bounded on the east, north, and west by Paba Thana, and the south by the Padma River with about 47.78 square km (Rahman, 2004). RCC consists of 30 wards, as shown in Fig. 1.

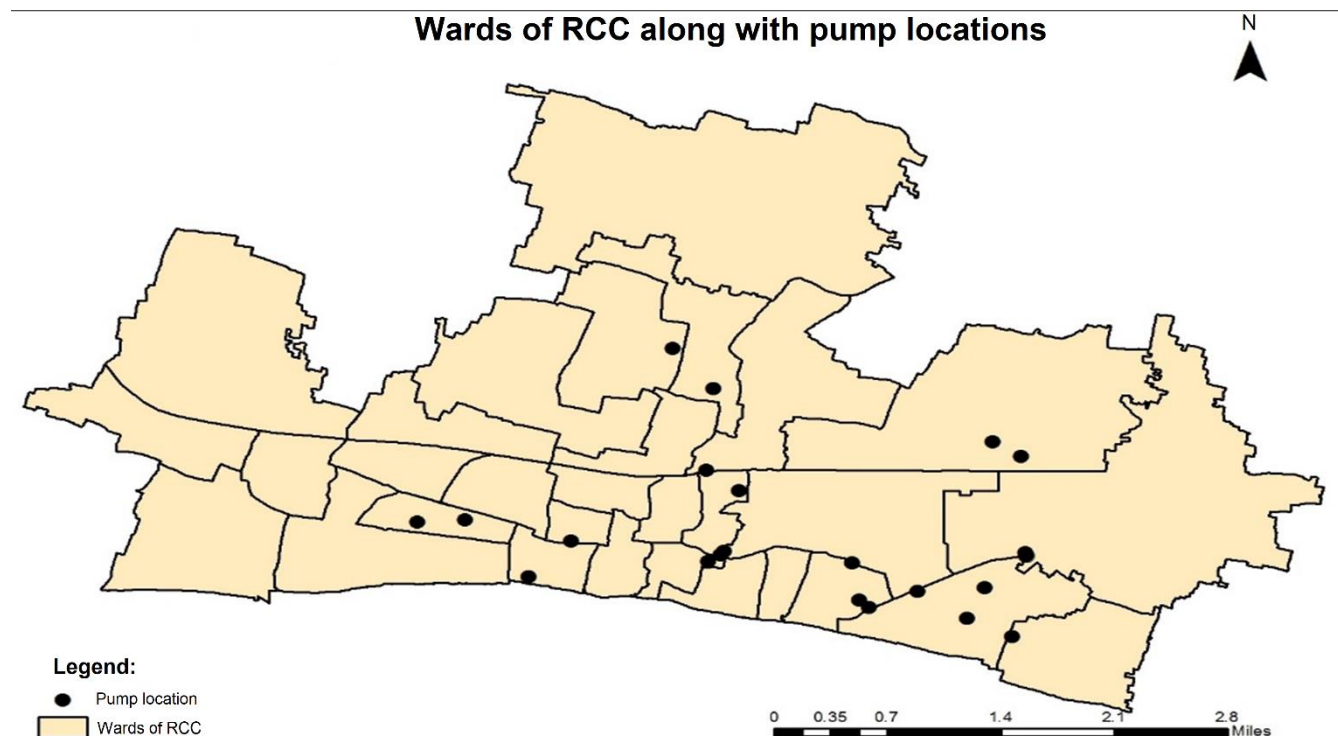

85

**Figure 1:** Study area (Source: Prepared by author).

### 2.2 Field survey

90 The authors conducted a questionnaire survey from people of the selected wards of RCC to know their concern about the significance of drinking water quality problems. They incorporated the questionnaire survey with questions on the water body, location, population of the village, common diseases in the locality, availability, and quality of drinking water (Alom and Habib, 2016).



### 2.3 Collection and preservation of water samples

The authors selected fourteen wards out of thirty wards of RCC for the investigation based on the public's water quality problems. The investigation mainly covered the central part of the city. They selected three consumers (S1, S2, and S3) points for each water source. They characterised fifty-six samples in total and surveyed the wards to evaluate water quality parameters. The authors collected samples in clean new 200 mL sterile bottles with corks that they pre-treated the bottles through washing with dilute HCl and later rinsed them with distilled water (Oyem et al., 2014). The testers then air-dried them in a dust-free environment.

### 2.4 Lab analysis

**Table 1:** Experimental methods for different types of parameters with their BDWSs and WHO standards.

| Type and name of parameters |                | Methods or machines used         | WHO standards                | BDWSs                        |
|-----------------------------|----------------|----------------------------------|------------------------------|------------------------------|
| Physical parameters         | pH             | pH meter                         | 6.5–8.5                      | 6.5–8.5                      |
|                             | Turbidity      | Turbidity meter                  | 5 NTU                        | 10 NTU                       |
|                             | Conductivity   | Conductivity meter               | --                           | 1200 $\mu\text{s cm}^{-1}$   |
|                             | Temperature    | Multi-parameter                  | 20–30 °C                     | 20–30 °C                     |
|                             | DO             | Multi-parameter                  | --                           | 6 mg L <sup>-1</sup>         |
|                             | Colour         | Spectrophotometer                | --                           | 15 Hazen                     |
|                             | Odour          | Threshold method                 | Odourless                    | Odourless                    |
| Chemical parameters         | Heavy metals   |                                  |                              |                              |
|                             | Manganese      | UV–VIS spectrophotometer         | 0.5 mg L <sup>-1</sup>       | 0.1 mg L <sup>-1</sup>       |
|                             | Arsenic        |                                  | 0.01 mg L <sup>-1</sup>      | 0.05 mg L <sup>-1</sup>      |
|                             | Iron           | Titration method                 | 0.3–1 mg L <sup>-1</sup>     | 0.3 mg L <sup>-1</sup>       |
|                             | BOD            |                                  | --                           | 0.2 mg L <sup>-1</sup>       |
|                             | COD            |                                  | --                           | 4 mg L <sup>-1</sup>         |
|                             | Residual Cl    |                                  | --                           | 0.2                          |
| Hardness                    |                | --                               | 200–500 mg L <sup>-1</sup>   |                              |
| Biological parameters       | TC             | Membrane Filtration Method (MFM) | 0 CFU (100 mL) <sup>-1</sup> | 0 CFU (100 mL) <sup>-1</sup> |
|                             | <i>E. coli</i> | Multiple tubes (MPN) method      | 0 CFU (100 mL) <sup>-1</sup> | 0 CFU (100 mL) <sup>-1</sup> |

### 2.5 Immediate analysis

The authors tested the collected water samples immediately after collecting samples for some physical parameters, including EC, pH, turbidity, and temperature (Martínez-Santos et al., 2017). They measured almost all these vital water quality



parameters within four hours of collection due to obtaining an accurate value (Fahmida et al., 2013). The testers thoroughly rinsed all probes of multi-parameter and wholly dried them with lint-free wipes or compressed air. The recommended order for calibration of the individual probes on a multi-parameter is EC, pH, and Turbidity (Guidelines for drinking-water quality, 2004).

## 110 3 Results and discussion

WHO standards and BDWSs evaluated the present quality of supplied water and the degree of water bodies' pollution. The authors studied the collected data with a statistical model developed by SPSS software (J et al., 2012).

### 3.1 General analysis

#### 3.1.1 Analysis of physical parameters

115 **pH:** It specifies the degree of acidity or alkalinity of water (Guettaf et al., 2017). The laboratory experiment found that pH values ranged from 6.4–7.5 following the BDWSs and WHO standards. Figure 2(a)

**Turbidity:** 50 % of the customers had turbidity higher than the acceptable value. Higher turbidity values were typical of consumers where source water satisfied allowable limit (WHO standards and BDWS). The maximum value was 25.22 NTU in ward 25 (S2), which means about five times WHO standards. Excessive turbidity or cloudiness in drinking water is aesthetically unappealing and represents a health concern. Turbidity can provide food and shelter for pathogens (Turbidity and water). From the laboratory analysis, the turbidity range for supplied water lied between 0.41–25.22 NTU. Although source water satisfies BDWSs and WHO standards, water contamination occurs during transport, storage with intermittent water supply (Edokpayi et al., 2018; Falconi et al., 2017). Figure 2(b)

120 **Temperature:** Samples collected from RWASA and users had a temperature ranged from 16.5–30 °C. Comparing BDWSs and WHO standards, the temperature of all samples satisfied BDWSs and WHO standards. However, it is not possible to measure the internal temperature of water within the pipe. Figure 2(c)

**Dissolved Oxygen (DO):** Almost all samples, both sources and consumers had a lower amount of DO and ranged from 0.19–3.5 mg L<sup>-1</sup>. The experimental results measured a declination of DO when water travelled from source to household premises in maximum wards. Figure 2(d)

130 The higher value of DO in water than the traditional values means the superior satisfactoriness of that water (Hossain et al., 2014). Higher BOD and COD indicate the lower DO. The lower DO indicates a higher amount of TC (Liyanage and Yamada, 2017).

**Electrical Conductivity (EC):** EC is the actual measure of a solution's ionic activity in terms of its capacity to transmit current (Mangi et al., 2017). The test results showed that the samples were high EC insoluble salts to the extent that except eight samples, almost all samples (Consumers and WASA) crossed BDWSs of 1200  $\mu\text{s cm}^{-1}$ . EC ranged from 450–1900  $\mu\text{s cm}^{-1}$ . Maximum and minimum values were in the household points of ward 13 and the source of ward 30, respectively. Forty-three samples had the EC range of 1250–1900  $\mu\text{s cm}^{-1}$ . Figure 2(e)

140 **Odour:** Out of fifty–six samples collected from the study area, the majority of about 90 % had an objectionable odour. Odour problem creates due to minerals such as iron or copper, may leach into water from the pipes or due to bacteria growing in a pipe or from organic matter or bacteria that are naturally present in lakes, reservoirs during the particular times of a year (Color, taste and odor problems in drinking water, 2018). Rest of the water samples was free from odour. Figure 2(f)



145

**Colour:** Coloured water is not always harmful to man, but the disinfection of water by Chlorination contains natural organics that produce colour resulting in the formation of Chloroform. So it is crucial to limit the colour of water for domestic and other purposes (Bari and Sarkar, 2017). In this study, twelve water samples had colour values beyond the recommended value of 15 Hazen. About forty-three samples had a colour range of 5–15 Hazen. Colour ranged from 5–20 Hazen. Ward 27, 29, and 12 had blackish, reddish, and black–reddish coloured water. They are metallic colours and represent high concentrated iron and manganese.

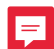

150

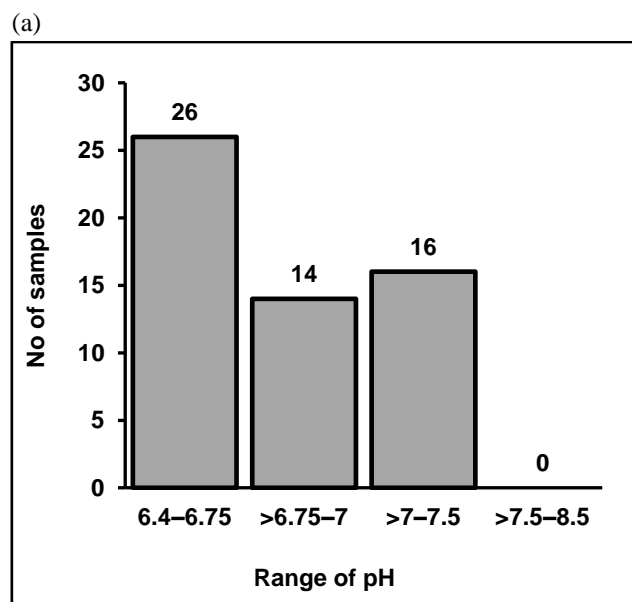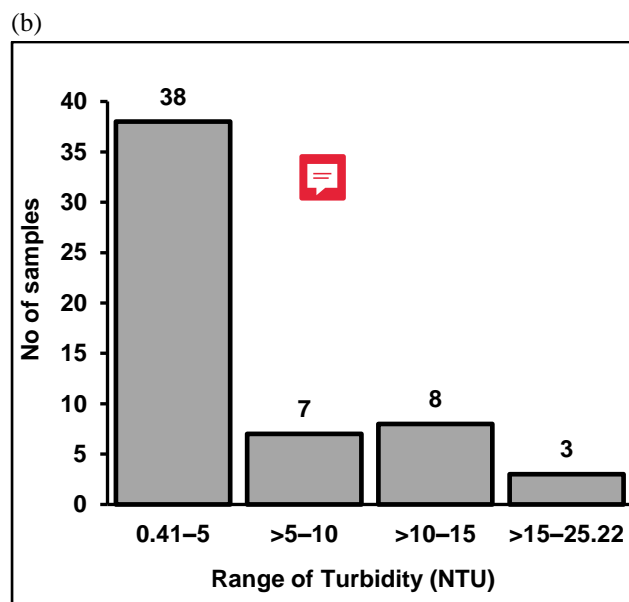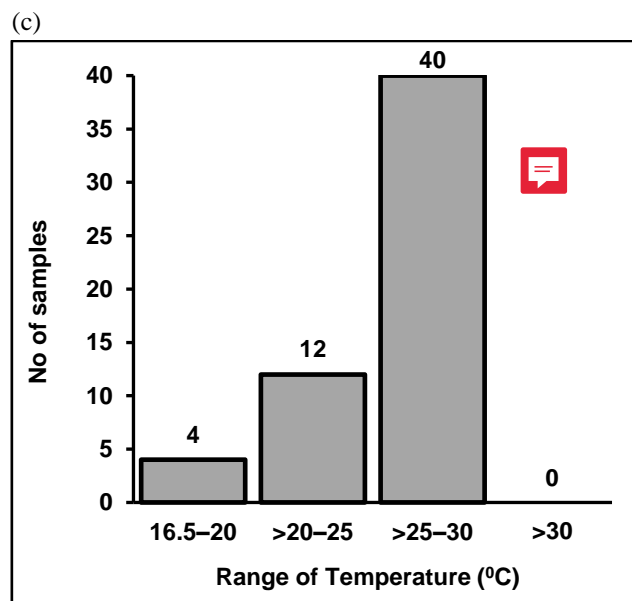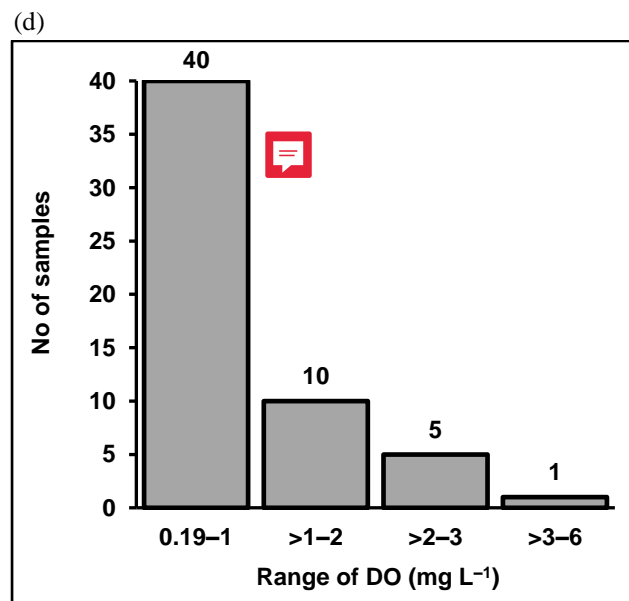

155

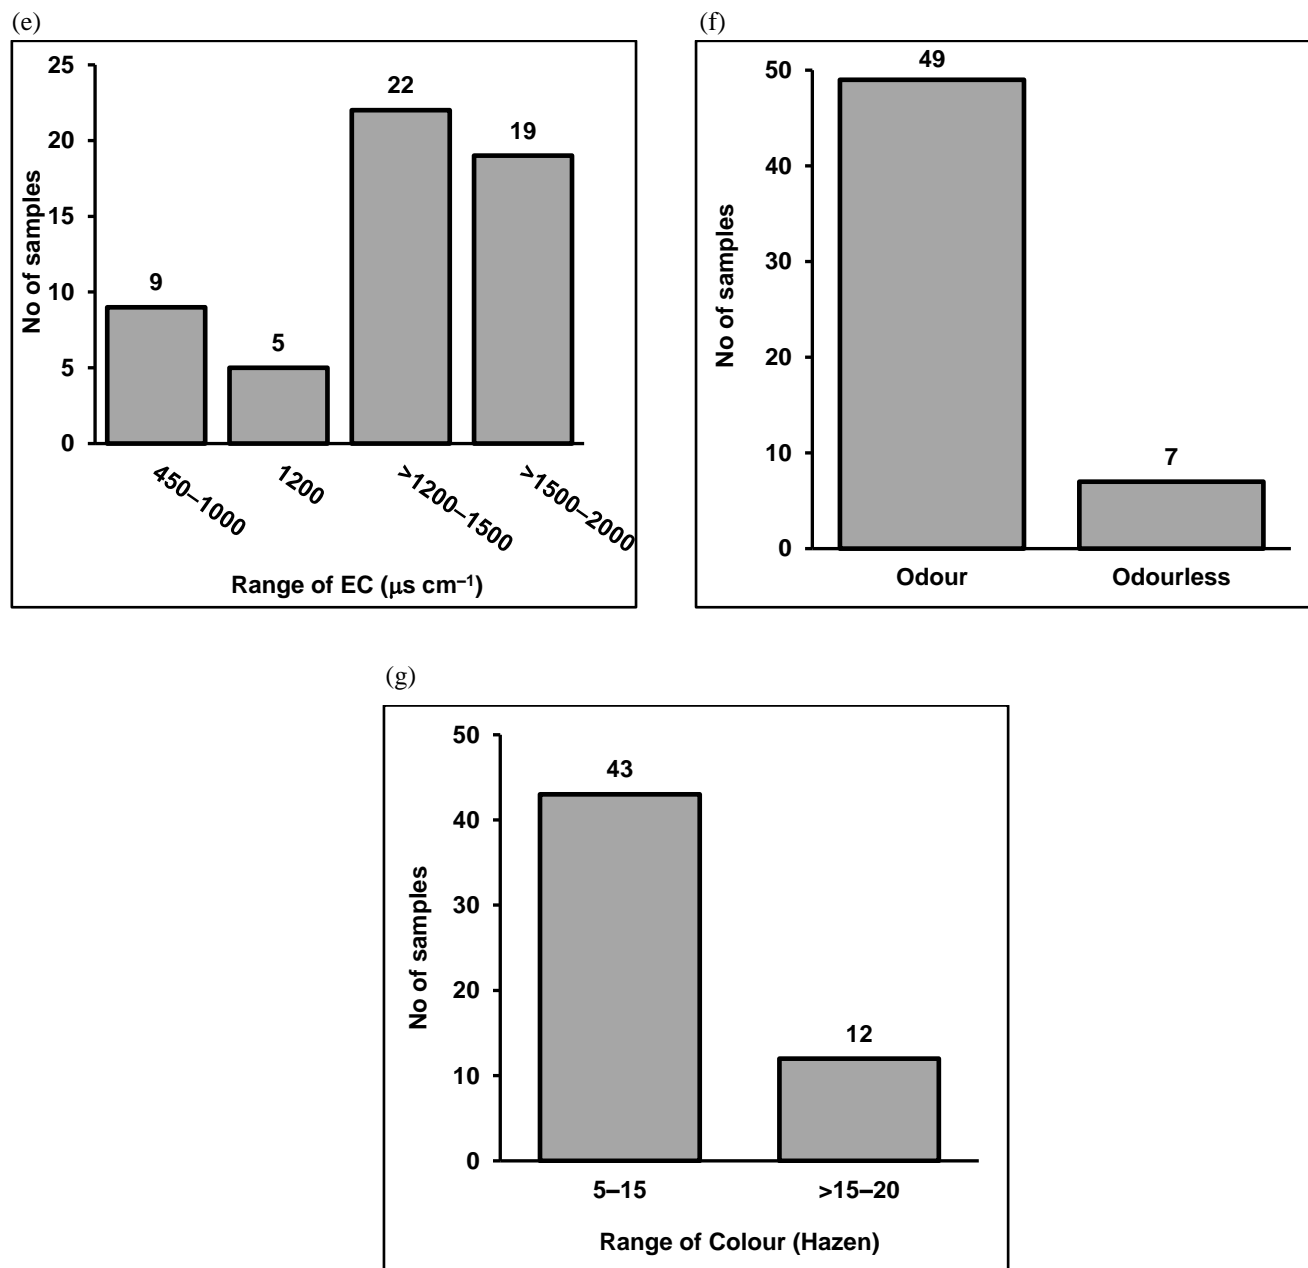

160

**Figure 2:** Representation of physical parameters: (a) pH, (b) Turbidity, (c) Temperature, (d) DO, (e) EC, (f) Odour/Odourless, and (g) Colour. 

### 3.1.2 Analysis of chemical parameters

165

**Heavy metal (Iron, Fe):** In the study area, the laboratory tests found a maximum Fe concentration of  $3.5 \text{ mg L}^{-1}$  (Consumer S2 from ward 12), and a minimum concentration of  $0.03 \text{ mg L}^{-1}$  (Sources of ward 11). The experimental analysis



found twenty–seven samples (Sources and users) above the permissible limit set by BDWSs. Nine samples had iron ranged from 0.03–0.2 mg L<sup>-1</sup>. Four samples were the same as the WHO standards. Twenty samples ranged from >0.3–1 mg L<sup>-1</sup>. Rock structures of the area are responsible for the high concentration of iron in the supplied water (Shigut et al., 2017). Figure 3(a)

170 **Heavy metal (Manganese, Mn):** Mn highly polluted the study area. Almost all samples had Mn greater than the permissible limit of both WHO standards and BDWSs. The minimum and maximum Mn concentrations of 0.6 mg L<sup>-1</sup> and 2.1 mg L<sup>-1</sup> were recorded in ward 8 (Consumers point S1) and ward 12 (Consumers point S2). Thirty–eight samples from both the consumers and the sources ranged from 0.60–1 mg L<sup>-1</sup>. The rest of the samples (S and U) had a range of 1.1–2.1 mg L<sup>-1</sup>, which is highly toxic for the consumers. It is mainly due to the depth of water in contact with the area's rock surfaces. High concentrated Fe and Mn in ward 12 resulted in the black–reddish water, and the consumers complained due to the presence of such type of metallic colour in the water at the survey period. Figure 3(b)

175 **Heavy metal (Arsenic, As):** There was a negligible amount of As present in the selected wards. The amount of As in all wards is below the BDWSs. Thirty–one samples were free from As. Six samples were precisely similar to WHO standards and were 0.01 mg L<sup>-1</sup>. Eighteen samples were slightly higher than WHO standards ranged from 0.015–0.03 mg L<sup>-1</sup>. The experiment found only one sample of 0.04 mg L<sup>-1</sup> in ward 28. Figure 3(c)

180 **Chemical Oxygen Demand (COD):** COD is always higher than BOD. Out of fifty–six samples collected from the study area, twenty–three and six samples had the COD higher than the desirable level (BDWSs) of 4 mg L<sup>-1</sup>, ranging from 4.5–6 mg L<sup>-1</sup>, and 6.5–8 mg L<sup>-1</sup> respectively. The concentration of two samples was 4 mg L<sup>-1</sup> similar to BDWSs. Twenty–five samples ranged from 1–3.5 mg L<sup>-1</sup> falling within the allowable range of BDWSs. Figure 3(d)

185 **Biological Oxygen Demand (BOD):** BOD ranged from 0.1–4 mg L<sup>-1</sup>. Except for two samples (0.1 mg L<sup>-1</sup> and 0.2 mg L<sup>-1</sup>), all the samples exceeded the BDWSs. Higher BOD and COD indicate the presence of high-level microorganisms. Figure 3(e)

190 **Residual Chlorine (Residual Cl):** Maximum concentration of Residual Cl was 1.13 mg L<sup>-1</sup> at the source (Ward 9). Sixteen samples ranged from 0.1–0.17 mg L<sup>-1</sup> lower than the BDWSs limit. Eight samples resulted in precisely similar to the BDWSs limit of 0.2 mg L<sup>-1</sup>. Sixteen samples ranged from 0.3–1.13 mg L<sup>-1</sup>. Fifteen samples had no Residual Cl (Ward 14 and 8). No Residual Cl and Residual Cl lower than BDWSs indicate the high amount of microorganisms. Figure 3(f)

195 **Total hardness:** Water can be soft (<75 mg L<sup>-1</sup>), moderately challenging (75–150 mg L<sup>-1</sup>), hard (150–300 mg L<sup>-1</sup>), and tough (>300 mg L<sup>-1</sup>) according to the concentration of Calcium (Ca) and Magnesium (Mg) (Alam et al., 2017). Out of fourteen sources and forty–two users in the RCC area, two sources and seven consumers exceeded the allowable limit of BDWSs. Four samples collected from both the sources and the consumers fell within the soft category ranged from 45–70 mg L<sup>-1</sup>. Fourteen samples ranged from 75–150 mg L<sup>-1</sup> fell within the moderate category. Nine samples ranged from 210–290 mg L<sup>-1</sup> were in the hard category. Nevertheless, the rests were classified as very hard ranged from 347.2–650 mg L<sup>-1</sup>. Figure 3(g)

200

205



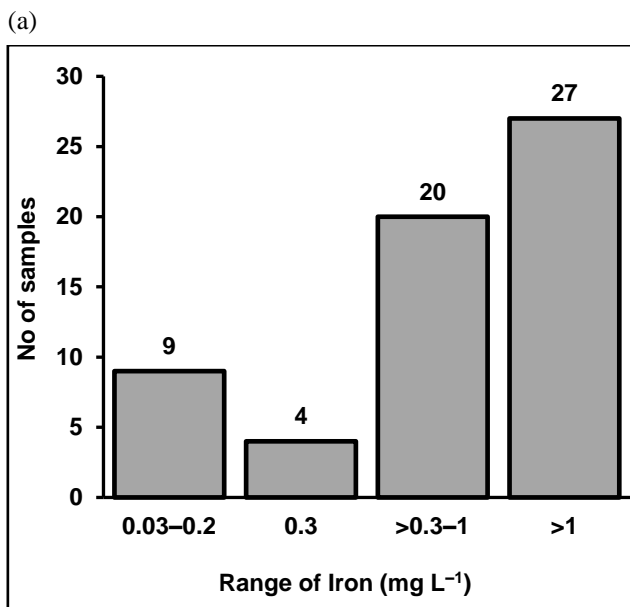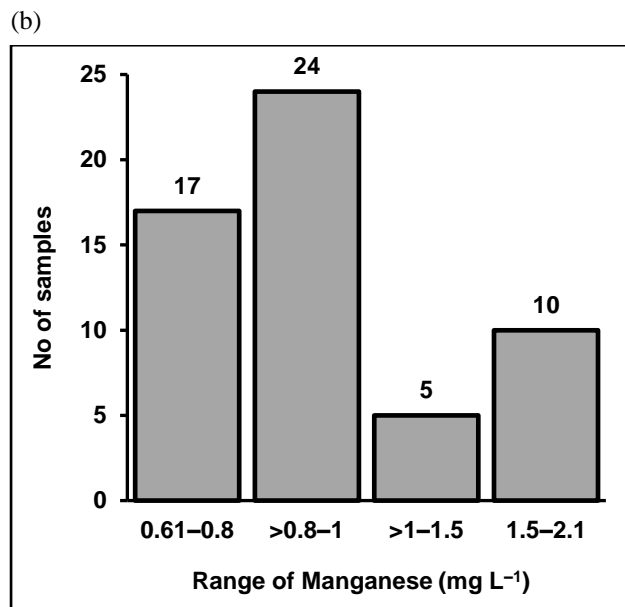

210

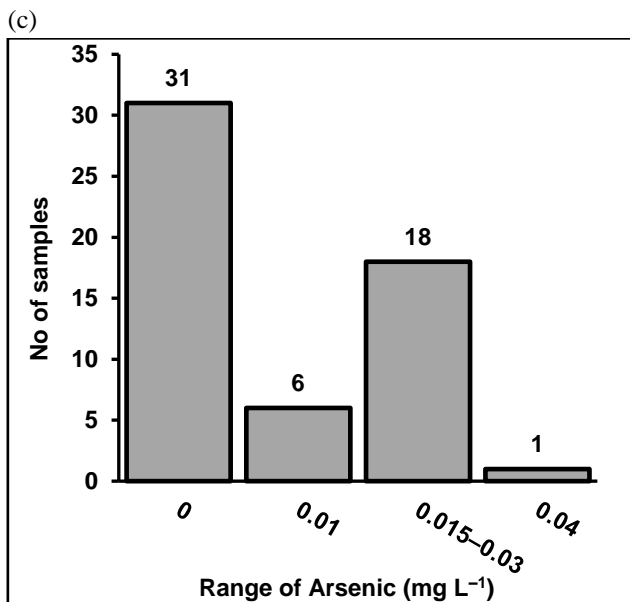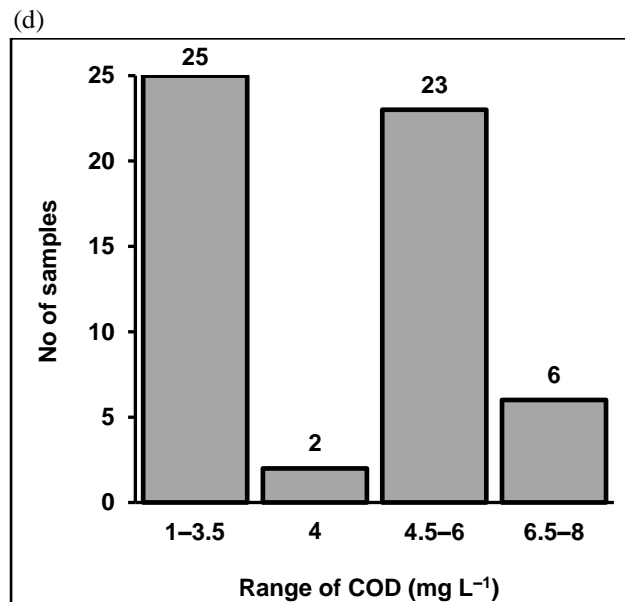

215

220

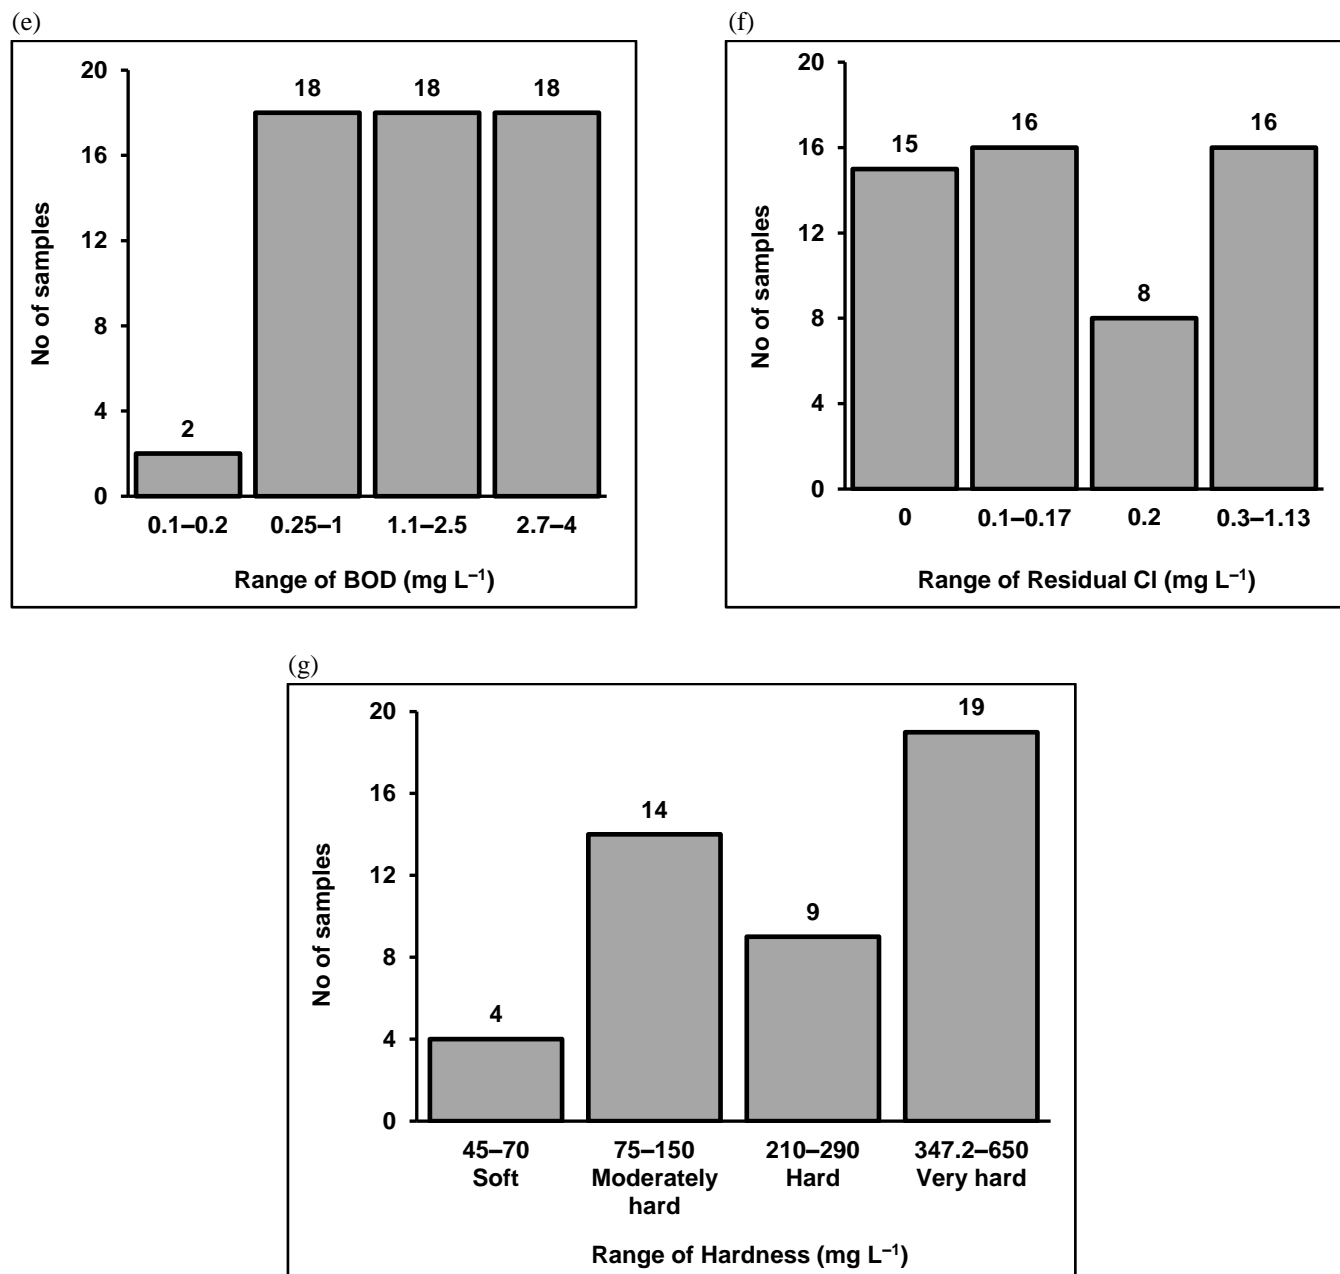

225

**Figure 3:** Representation of chemical parameters: (a) Iron, (b) Manganese, (c) Arsenic, (d) COD, (e) BOD, (f) Residual Cl, and (g) Hardness.

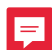

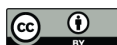

### 3.1.3 Analysis of microbiological parameters

230 Potential causes regarding the growth of TC and *E. coli* in DWDSs are biofilm formation, cell detachment, sample tap  
contamination, damaged water treatment, and supply infrastructure. They allow the ingress of water from the surroundings  
(Ellis et al., 2018).

235 **Total Coliform (TC):** All samples contained TC. Thirty-one sample had the TC ranged from 15–40 CFU (100 mL)<sup>-1</sup>,  
and twenty-five samples ranged from >40–255 CFU (100 mL)<sup>-1</sup>. Ward 23 contained a higher amount of TC in both the  
sources (170 CFU (100 mL)<sup>-1</sup>), and the user points (240, 255, and 185 CFU (100 mL)<sup>-1</sup>). Few user points had the TC twice or  
thrice than that of the sources (i.e. in ward 26, 27, 29, 11, 12, 8, 9, and 19). Figure 4(a)

240 ***E. coli*:** Twenty-eight and twenty-two samples had *E. coli* ranged from 3–15 CFU (100 mL)<sup>-1</sup>, and 16–34 CFU (100  
mL)<sup>-1</sup> respectively. However, six samples contained a higher concentration *E. coli* of 40–60 CFU (100 mL)<sup>-1</sup>. The maximum  
and minimum values of *E. coli* from the samples were 3 CFU (100 mL)<sup>-1</sup> (Sources of ward 27), and 60 CFU (100 mL)<sup>-1</sup> (User  
points of ward 29) respectively. Sources of ward 8, 30, and 14 were free from *E. coli* microorganisms. According to BDWSs  
and WHO standards, drinking and domestic water should be free from any bacteria. Figure 4(b)

245 So, the RCC area's water does not safe considering the microbiological aspects of water quality standards. Most microbes  
get shelter in the biofilm on the pipeline's inner surface in WDS (Gulati and Ghosh, 2017). This test result shows that user  
points contain a higher amount of bacteria than the sources. The paper explained the reasons for regrowth above. Additionally,  
there is a proportional relationship between high Temperature and the regrowth of microorganisms. Because organism  
respiration and cell growth become easier at an increased temperature. An increase in microorganisms occurring within WDS  
results in the decline of DO (Power and Nagy, 1999).

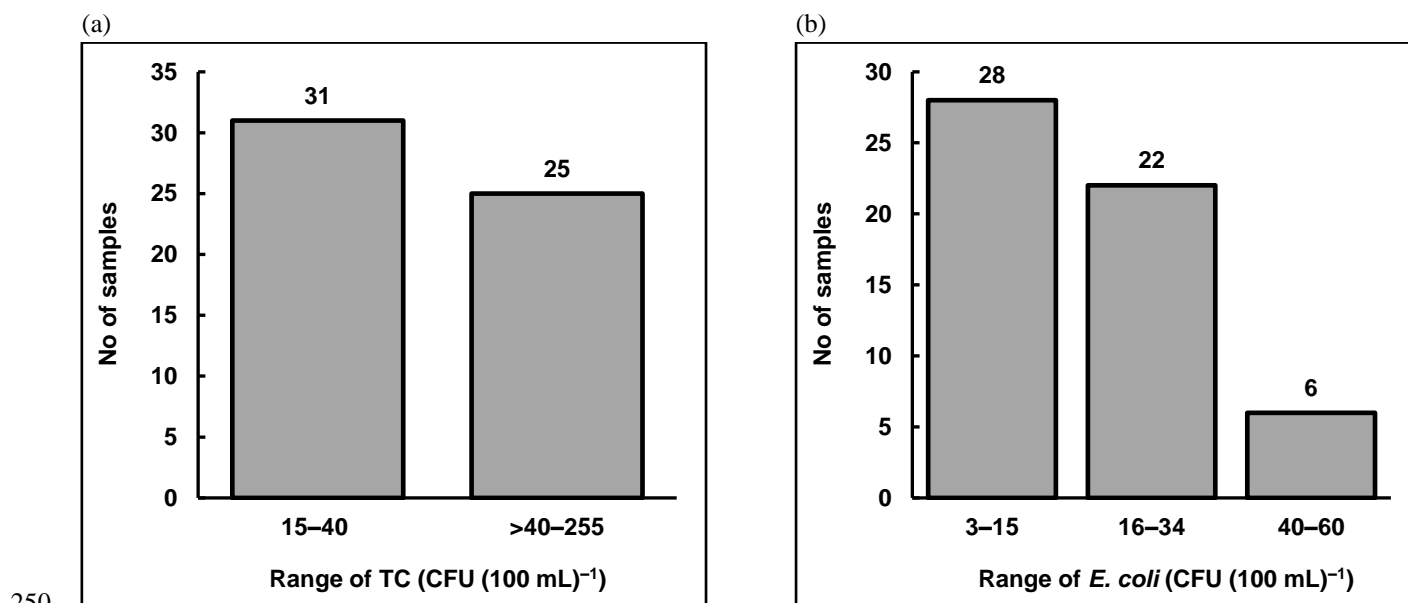

Figure 4: Representation of biological parameters: (a) TC, and (b) *E. coli*.



### 3.2 Statistical analysis

255 The authors collected the samples from RWASA points and household samples of the RCC wards. They analysed a total of fourteen parameters. Out of them, seven samples were chemical (50 %), five were physical (35.71 %), and two were microbiological (14.29 %) parameters.

Mean is the average of numbers, a calculated central value of a set of numbers. Standard Deviation (SD) is the degree used to quantify the difference in the dispersion of a set of data values. Standard Error of Mean (SEM) is a method of statistical data check. The SEM is the method that estimates the SD of a distribution (RICHARDI.LEVIN, 1978).

260 Table 2 shows the results of both physical and chemical parameters found in descriptive statistics [Mean ± SD]. The table also describes the SEM. The obtained results show the characteristics of the overall water quality.

**Table 2:** Mean ± SD, SEM of the standards.

| Type and name of parameters | WASA           | SEM            | Consumer | SEM            | BDWSs | WHO standards               |                         |
|-----------------------------|----------------|----------------|----------|----------------|-------|-----------------------------|-------------------------|
| Physical parameters         | pH             | 6.8±0.21       | 0.03     | 6.87±0.29      | 0.04  | 6.5–8.5                     | 6.5–8.5                 |
|                             | Turbidity      | 2.77±2.43      | 0.37     | 5.27±6.57      | 1.01  | 10 NTU                      | 5 NTU                   |
|                             | Temperature    | 26.05±2.90     | 0.44     | 26.06±3.48     | 0.54  | 20–30 °C                    | 20–30 °C                |
|                             | EC             | 1264.28±349.26 | 53.89    | 1368.21±412.78 | 63.69 | 1200 µs cm <sup>-1</sup>    | --                      |
|                             | DO             | 1.29±1.22      | 0.19     | 1.59±1.40      | 0.22  | 6 mg L <sup>-1</sup>        | --                      |
| Chemical parameters         | Fe             | 0.69±0.66      | 0.10     | 1.28±1.07      | 0.16  | 0.3–1 mg L <sup>-1</sup>    | 0.3 mg L <sup>-1</sup>  |
|                             | As             | 0.01±0.01      | 0.002    | 0.01±0.01      | 0.001 | 0.05 mg L <sup>-1</sup>     | 0.01 mg L <sup>-1</sup> |
|                             | Mn             | 0.98±0.35      | 0.05     | 1.10±0.44      | 0.07  | 0.1 mg L <sup>-1</sup>      | 0.5 mg L <sup>-1</sup>  |
|                             | COD            | 3.42±1.06      | 0.25     | 3.98±1.73      | 0.27  | 4 mg L <sup>-1</sup>        | --                      |
|                             | BOD            | 1.67±1.09      | 0.17     | 1.88±1.15      | 0.18  | 0.2 mg L <sup>-1</sup>      | --                      |
|                             | Residual Cl    | 0.27±0.29      | 0.04     | 0.18±0.22      | 0.03  | 0.2 mg L <sup>-1</sup>      | --                      |
|                             | Hardness       | 282.73±193.73  | 29.89    | 334.79±203.52  | 31.40 | 2000–500 mg L <sup>-1</sup> | --                      |
| Biological parameters       | TC             | 40.00±40.25    | 6.21     | 71.61±65.65    | 10.13 | 0 CFU mL <sup>-1</sup>      | 0 CFU mL <sup>-1</sup>  |
|                             | <i>E. coli</i> | 8.21±9.17      | 1.42     | 20.59±13.23    | 2.04  | 0 CFU mL <sup>-1</sup>      | 0 CFU mL <sup>-1</sup>  |

265

**Table 3:** Minimum and maximum values at RWASA points and household samples.

| Type and name of parameters | RWASA points |         | Household samples |         |
|-----------------------------|--------------|---------|-------------------|---------|
|                             | Minimum      | Maximum | Minimum           | Maximum |
| pH                          | 6.5          | 7.12    | 6.4               | 7.5     |



|                       |                |      |      |      |       |
|-----------------------|----------------|------|------|------|-------|
| Physical parameters   | Turbidity      | 0.5  | 7.63 | 0.41 | 25.22 |
|                       | Temperature    | 20   | 29   | 16.5 | 30    |
|                       | EC             | 450  | 1600 | 425  | 1900  |
|                       | DO             | 0.25 | 5    | 0.37 | 5.5   |
| Chemical parameters   | Fe             | 0.03 | 2.5  | 0.04 | 3.5   |
|                       | Mn             | 0.6  | 1.7  | 0.64 | 2.1   |
|                       | As             | 0    | 0.03 | 0    | 0.04  |
|                       | COD            | 1    | 7    | 1.2  | 8     |
|                       | BOD            | 0.1  | 3.2  | 0.2  | 4     |
|                       | Residual Cl    | 0    | 1.13 | 0    | 1.1   |
|                       | Hardness       | 45   | 597  | 60   | 650   |
|                       |                |      |      |      |       |
| Biological parameters | TC             | 10   | 170  | 18   | 255   |
|                       | <i>E. coli</i> | 0    | 32   | 5    | 60    |

270 Table 3 shows the minimum and maximum values of RWASA points and household samples. The minimum and maximum  
 values of water samples for pH ranged from 6.5–7.12 and 6.4–7.5, turbidity from 0.5–7.63 NTU and 0.41–25.22 NTU,  
 temperature from 20–29 °C and 16.5–30 °C, EC from 450–1600  $\mu\text{s cm}^{-1}$  and 425–1900  $\mu\text{s cm}^{-1}$ , DO from 0.25–5  $\text{mg L}^{-1}$  and  
 0.37–5.5  $\text{mg L}^{-1}$  at the RWASA points and household samples respectively. The amount of Fe ranged from 0.03–2.5  $\text{mg L}^{-1}$   
 and 0.04–3.5  $\text{mg L}^{-1}$ , Mn from 0.6–1.7  $\text{mg L}^{-1}$  and 0.64–2.1  $\text{mg L}^{-1}$ , COD from 1–7  $\text{mg L}^{-1}$  and 1.2–8  $\text{mg L}^{-1}$ , BOD from 0.1–  
 275 3.2  $\text{mg L}^{-1}$  and 0.2–4  $\text{mg L}^{-1}$ , Residual Cl from 0–1.13  $\text{mg L}^{-1}$  and 0–1.1  $\text{mg L}^{-1}$ , hardness from 45–597  $\text{mg L}^{-1}$  and 60–650  
 $\text{mg L}^{-1}$ , TC from 10–170  $\text{mg L}^{-1}$  and 18–255  $\text{mg L}^{-1}$ , *E. coli* from 0–32  $\text{mg L}^{-1}$  and 5–60  $\text{mg L}^{-1}$ , As from 0–0.03  $\text{mg L}^{-1}$  and  
 0–0.04  $\text{mg L}^{-1}$  respectively at the RWASA points and household samples following the WHO (2006) standards and BDWSs.

### 3.2.1 Correlation matrix of the physicochemical parameters

280 Pearson correlation ( $r$ ) verifies the co-relationship between the physical, chemical, and microbiological parameters of different  
 water sources. The Pearson correlation finds a correlation between at least two continuous variables. The correlation value  
 ranges from  $-1.00$  to  $+1.00$ . There are two kinds of correlation: (1) Positive correlation and (2) Negative correlation. The  
 Pearson correlation values can range between 0.00 (No correlation), and  $\pm 1.00$  (Strong correlation). More precisely, the  
 parameters having  $r = 0.7$  are strongly correlated. The parameters of  $r$ -value between 0.5 and 0.7 have a moderate correlation  
 (Springer paper). The test revealed several significant interactions among the study area water samples' physical, chemical,  
 and microbiological variables. Many parameters showed different correlations at the water from the RWASA points and  
 285 household samples (Table 4 and Table 5).

**Table 4:** First correlation between the physical, chemical, and microbiological parameters using Pearson correlation ( $r$ ).

|    | Fe | Mn | COD | BOD | Residual Cl | Hardness | TC | <i>E. coli</i> | As | pH | Turbidity | Temperature | EC | DO |
|----|----|----|-----|-----|-------------|----------|----|----------------|----|----|-----------|-------------|----|----|
| Fe | 1  |    |     |     |             |          |    |                |    |    |           |             |    |    |



|                |       |        |        |        |       |        |      |       |        |       |       |       |       |   |
|----------------|-------|--------|--------|--------|-------|--------|------|-------|--------|-------|-------|-------|-------|---|
| Mn             | 0.12  | 1      |        |        |       |        |      |       |        |       |       |       |       |   |
| COD            | -0.2  | 0.3    | 1      |        |       |        |      |       |        |       |       |       |       |   |
| BOD            | -0.1  | 0.2    | .861** | 1      |       |        |      |       |        |       |       |       |       |   |
| Residual Cl    | -0.1  | 0      | -.46** | -.391* | 1     |        |      |       |        |       |       |       |       |   |
| Hardness       | -0.1  | .373*  | 0.12   | 0.15   | -0.05 | 1      |      |       |        |       |       |       |       |   |
| TC             | -0.1  | 0      | 0.27   | .483** | -0.12 | -0.3   | 1    |       |        |       |       |       |       |   |
| <i>E. coli</i> | .324* | -.39** | -.48** | -.314* | -0.2  | -.369* | -.1  | 1     |        |       |       |       |       |   |
| As             | -0.2  | -.49** | -0.2   | -0.1   | -0.24 | .414** | -.2  | .364* | 1      |       |       |       |       |   |
| pH             | 0.24  | .554** | 0.04   | 0.05   | -0.07 | 0.2    | 0    | 0.21  | -0.2   | 1     |       |       |       |   |
| Turbidity      | 0.09  | -.332* | -.41** | -.43** | -0.16 | -0.2   | -.1  | 0.24  | 0.09   | -.36* | 1     |       |       |   |
| Temperature    | 0.02  | -0.2   | -0.2   | -0.1   | 0.153 | -0.1   | 0    | -0.21 | -0.1   | 0     | -0.17 | 1     |       |   |
| EC             | -0.1  | 0.3    | .358*  | 0.23   | -0.18 | 0      | 0.13 | -0.27 | -.46** | 0     | -0.21 | -0.28 | 1     |   |
| DO             | 0.08  | -0.1   | -0.3   | -0.3   | 0.01  | 0      | -0.2 | -0.03 | -0.1   | 0     | .355* | .035  | .346* | 1 |

\*Correlation is significant at the 0.05 level (2-tailed)

\*\*Correlation is significant at the 0.01 level (2-tailed)

290

From table 4, Fe is correlated positively with Mn ( $r = 0.12$ ), *E. coli* ( $r = 0.324$ ), pH ( $r = 0.24$ ), turbidity ( $r = 0.09$ ), temperature ( $r = 0.02$ ), DO ( $r = 0.08$ ), and negatively correlated with COD ( $-0.2$ ), BOD ( $-0.1$ ), Residual Cl ( $-0.1$ ), hardness ( $-0.1$ ), TC ( $-0.1$ ). Mn is positively correlated with COD (0.3), BOD (0.2), hardness (.373), pH (.554), EC (0.3), no correlation with Residual Cl (0), TC (0), and negatively correlated with *E. coli* ( $-0.399$ ), As ( $-0.494$ ), turbidity ( $-0.332$ ), temperature ( $-0.2$ ), DO ( $-0.1$ ). COD is positively correlated with BOD (.861), hardness (0.12), TC (0.27), pH (0.04), EC (.358), and negatively correlated with Residual Cl ( $-0.458$ ), *E. coli* ( $-0.478$ ), As ( $-0.2$ ), turbidity ( $-0.410$ ), temperature ( $-0.2$ ), DO ( $-0.3$ ). BOD is positively correlated with hardness (0.15), TC (.483), pH (0.05), EC (0.23), and negatively correlated with Residual Cl ( $-0.391$ ), *E. coli* ( $-0.314$ ), As ( $-0.1$ ), turbidity ( $-0.429$ ), temperature ( $-0.1$ ), DO ( $-0.3$ ).

Residual Cl is positively correlated with temperature (0.153), DO (0.01), and negatively correlated with hardness ( $-0.05$ ), TC ( $-0.12$ ), *E. coli* ( $-0.2$ ), As ( $-0.24$ ), pH ( $-0.07$ ), turbidity ( $-0.16$ ), EC ( $-0.18$ ). Hardness is positively correlated with As (.414), pH (0.2), no correlation with EC (0), DO (0), and negatively correlated with turbidity ( $-0.2$ ), temperature ( $-0.1$ ), TC ( $-0.3$ ), *E. coli* ( $-0.369$ ). TC is positively correlated with EC (0.13), no correlation with pH (0), temperature (0), and negatively correlated with *E. coli* ( $-0.1$ ), As ( $-0.2$ ), turbidity ( $-0.1$ ), DO ( $-0.2$ ). *E. coli* is positively correlated with As (.364), pH (0.21), turbidity (0.24), and negatively correlated with temperature ( $-0.21$ ), EC ( $-0.27$ ), DO ( $-0.03$ ). Whereas, As is positively correlated with turbidity (0.09), and negatively correlated with pH ( $-0.2$ ), temperature ( $-0.1$ ), EC ( $-0.464$ ), DO ( $-0.1$ ). pH has no correlation with temperature (0), EC (0), DO (0), and is negatively correlated with turbidity ( $-0.362$ ). Turbidity is positively



correlated with DO (.355) and negatively correlated with temperature (-0.17), EC (-0.21). Temperature is positively correlated with DO (0.035) and negatively correlated with EC (-0.28). DO is positively correlated with EC (.346).

310

**Table 5:** Second correlation between the physical, chemical, and microbiological parameters using Pearson correlation (r).

|                | Fe    | Mn     | COD    | BOD     | Residual Cl | Hardness | TC     | <i>E. coli</i> | As   | pH | Turbidity | Temperature | EC   | DO |
|----------------|-------|--------|--------|---------|-------------|----------|--------|----------------|------|----|-----------|-------------|------|----|
| Fe             | 1     |        |        |         |             |          |        |                |      |    |           |             |      |    |
| Mn             | .22   | 1      |        |         |             |          |        |                |      |    |           |             |      |    |
| COD            | 0     | .2     | 1      |         |             |          |        |                |      |    |           |             |      |    |
| BOD            | .09   | .3     | .79**  | 1       |             |          |        |                |      |    |           |             |      |    |
| Residual Cl    | 0     | -0.1   | -.5**  | -.5**   | 1           |          |        |                |      |    |           |             |      |    |
| Hardness       | 0     | .43**  | .08    | 0.13    | .028        | 1        |        |                |      |    |           |             |      |    |
| TC             | -0.2  | -0.1   | .374*  | .61**   | -.315*      | -0.2     | 1      |                |      |    |           |             |      |    |
| <i>E. coli</i> | .29   | -0.2   | -.36*  | -.4**   | 0.11        | -.321*   | -0.2   | 1              |      |    |           |             |      |    |
| As             | 0.1   | -0.2   | 0.21   | 0.19    | -0.13       | 0.2      | 0      | 0.15           | 1    |    |           |             |      |    |
| pH             | .12   | .41**  | 0      | 0.13    | -0.01       | 0.3      | 0      | -0.03          | -0.3 | 1  |           |             |      |    |
| Turbidity      | 0.2   | -0.36* | -0.35* | -0.52** | .164        | -0.2     | -0.35* | 0.44**         | -0.1 | 0  | 1         |             |      |    |
| Temperature    | -.36* | -0.37* | -0.2   | 0       | .038        | -0.1     | 0.15   | -0.41**        | 0    | 0  | -0.41**   | 1           |      |    |
| EC             | -0.1  | .331*  | .48**  | 0.3     | -0.19       | 0.1      | 0.2    | -0.25          | -0.1 | 0  | -0.34*    | -0.18       | 1    |    |
| DO             | 0.03  | -0.2   | -0.2   | -0.1    | 0.15        | 0.2      | -0.2   | -0.12          | 0.05 | 0  | 0.052     | .177        | .33* | 1  |

\*Correlation is significant at the 0.05 level (2-tailed)

\*\*Correlation is significant at the 0.01 level (2-tailed)

315

From table 5, Fe is correlated positively with Mn ( $r = 0.22$ ), BOD (0.09), *E. coli* (0.29), As (0.1), pH ( $r = 0.12$ ), turbidity (0.2), DO (0.03), no correlation with COD (0), Residual Cl (0), hardness (0), and negatively correlated with temperature ( $r = -0.363$ ), TC (-0.2), EC (-0.1). Mn is positively correlated with COD (0.2), BOD (0.3), hardness (.432), EC (0.331), pH (0.41), and negatively correlated with Residual Cl (-0.1), *E. coli* (-0.2), turbidity (-0.36), temperature (-0.37), DO (-0.2). COD is positively correlated with BOD (.792), TC (0.374), EC (.48), hardness (0.08), As (0.21), no correlation with pH (0), and negatively correlated with Residual Cl (-0.458), *E. coli* (-0.36), turbidity (-0.35), temperature (-0.2), DO (-0.2). BOD is positively correlated with hardness (0.13), TC (.61), pH (0.13), As (0.19), EC (0.3), no correlation with temperature (0), and negatively correlated with Residual Cl (-0.5), turbidity (-0.522), *E. coli* (-0.4), DO (-0.1). Residual Cl is positively correlated with hardness (0.028), DO (0.148), *E. coli* (0.11), turbidity (0.164), temperature (0.038), and negatively correlated with TC (-0.315), As (-0.13), pH

325



(-0.01), EC (-0.19). Hardness is positively correlated with As (.2), pH (0.3), EC (.1), DO (0.2), and negatively correlated with turbidity (-0.2), temperature (-0.1), TC (-0.2), *E.coli* (-.321).

330 TC is positively correlated with temperature (.15), EC (0.2), no correlation with As (0), pH (0), and negatively correlated with *E.coli* (-0.2), turbidity (-0.348), DO (-0.2). *E.coli* is positively correlated with As (.15), turbidity (0.441), and negatively correlated with temperature (-0.412), EC (-0.25), DO (-0.12), pH (-0.03). Whereas, As is positively correlated with DO (0.05), no correlation with temperature (0), and negatively correlated with turbidity (-.1), pH (-0.3), EC (-.1). Turbidity is positively correlated with DO (.052) and negatively correlated with temperature (-0.411), EC (-0.339). pH has no correlation with temperature (0), EC (0), DO (0), and turbidity (0). Temperature is positively correlated with DO (0.177) and negatively correlated with EC (-0.18). DO is positively correlated with turbidity (0.052), temperature (0.177), EC (.33).

335 The presence of specific pollution indicators influences the presence of or increase in some other parameters. The increase in one physical or chemical parameter indicates the increase or decrease of another parameter. For example, a higher TC means more cations than anions in water. The EC of water increases with more ions in water. We can ultimately determine the EC concentration through measuring the EC of water.

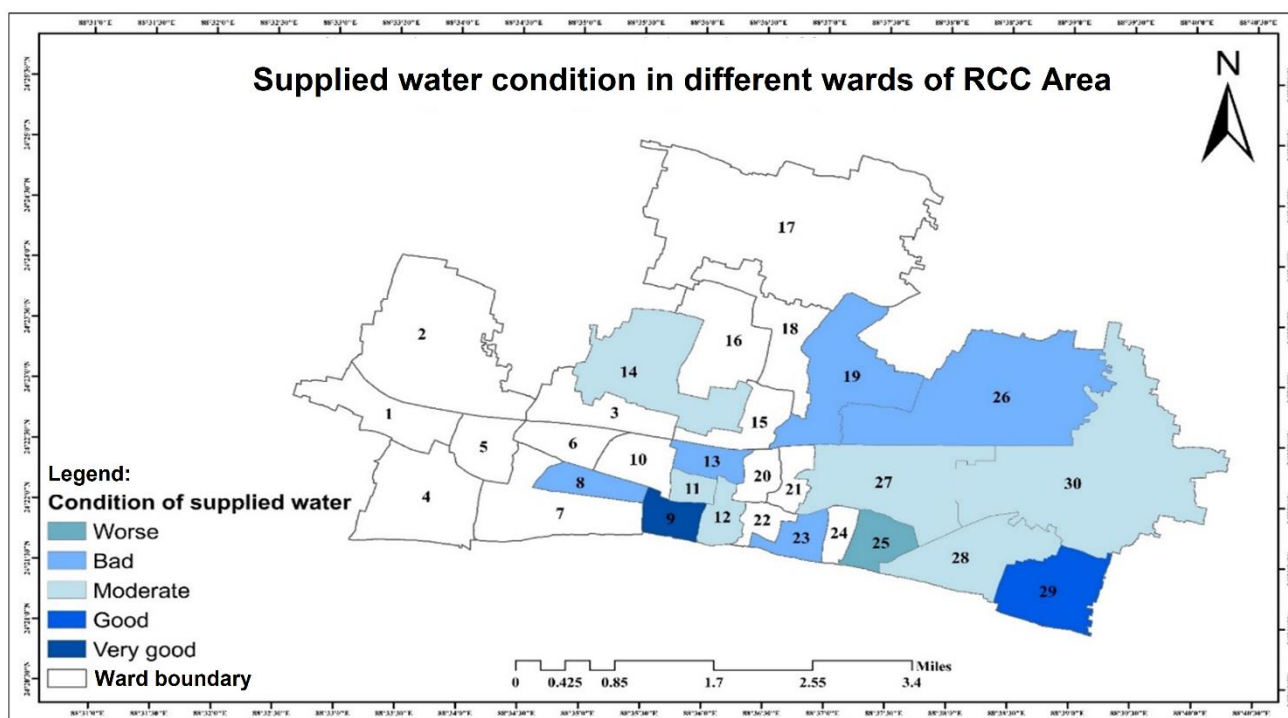

340

**Figure 5:** Supplied water condition in the wards of RCC Area 

In Fig. 5, the authors ranked the supplied water conditions based on water parameters and standards' quality. They termed the conditions following the weighted-index method. According to Fig. 5, they found water to condition the best in ward 9 (i.e. very good), and ward 29 (i.e. good). On the other hand, the worst-conditioned water existed in ward 25. 

345





### 3.3 Health effects

The concentration of Mn in a water body is associated with lower memory, attention, motor functions, mathematics achievement scores, perceptual reasoning, working memory, and behaviour problems. Moreover, epidemiological evidence and previous reports anticipate that elevated Mn concentration in drinking water is responsible for lower IQ in a group of school-aged children of 6–13 years (Dion et al., 2018). A high concentration of the metals (Coupling of Fe and Mn) creates the major esthetic problems that lead to taste and odour problems. Elevated concentration causes harmful health effects (Ander et al., 2016). The taste (Organoleptic problem) is affected when Fe's concentration is above  $0.3 \text{ mg L}^{-1}$ . High Fe in the DWDSs and its ingestion can cause hemochromatosis with symptoms like chronic fatigue, arthritis, heart disease, cirrhosis, diabetes, thyroid disease, impotence, and sterility (Khan et al., 2013). The water of hardness below  $300 \text{ mg L}^{-1}$ , is portable. Nevertheless, it causes gastrointestinal irritation beyond this limit.

Biofilms create taste and odour problems in the distributed water. Top categories of *E.coli* are not harmful, but some can cause diarrhoea, abdominal pain, fever, sometimes vomiting, and urine infections. Furthermore, certain types of *E.coli* infection may lead to kidney failure (What to know about *E. coli* infection, 2017). Bacterial gastrointestinal diseases like cholera, salmonellosis, and shigellosis transmit through water. Undesirable pathogens in DWDSs are responsible for the outbreak of water-borne diseases (Sharif et al., 2017). *Salmonella typhi* and *Salmonella paratyphi* cause typhoid fever (Jayaswal et al., 2018). There is an intimate relationship between public health and water. People suffer from various water-borne diseases consuming poor-quality supplied water by RWASA. The questionnaire survey reported the percentage of RCC people suffered from various types of diseases like diarrhoea, cholera, typhoid, mental disorder, and other problems as 45 %, 25 %, 15 %, 55 %, and 15 % respectively (Fig. 6).

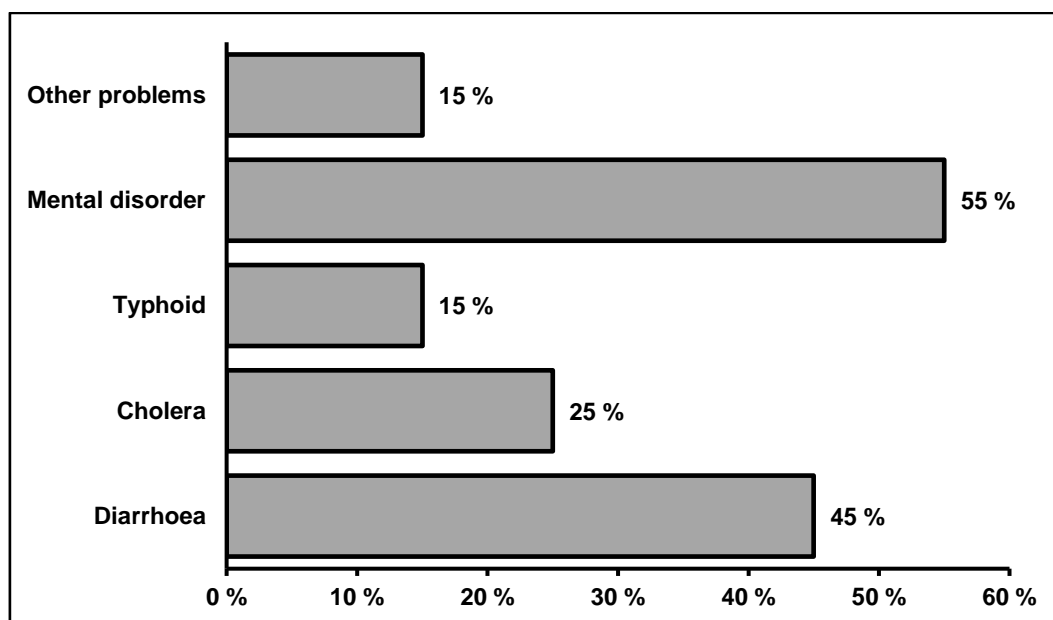

Figure 6: Percentage of various diseases from the questionnaire survey.



#### 4 Conclusions

370 Water quality deterioration of RWASA sources occurred during the household storage. The concerned authority poorly  
practised the regular monitoring of supplied water quality. Deteriorated water quality resulted in the outbreak of various water-  
borne diseases. User points contained a higher amount of bacteria than the sources. Wards with lesser DO and Residual Cl (i.e.  
ward 8, 9, and 3) indicate a higher amount of microorganisms, BOD, and COD. So, the parameters DO, Residual Cl, TC, and  
EC have an apparent interrelationship. All samples contained a higher concentration of Mn. Majority of the samples had a  
375 higher amount of Fe. pH, temperature, and colour were within the allowable range. The study also found elevated concentration  
of BOD and COD as per the BDWSs and WHO standards. 

**Limitations of the study.** The authors cannot investigate *Pseudomonas Aeromonas, Artrobacter, Caulobacter, Klebsiella*  
*Bacillus, Enterobacter, Citrobacter, and Acinetobacter Prosthescomicrobium, Alcaligenes, Serratior, and Actinolegionella*  
380 due to insufficient lab facilities. The knowledge of water storage lengths at the households, length of pipes from tap to  
consumer storage, no fittings, and cross-connections are unknown.

**Code availability.** Application of SPSS software.

385 **Data availability.** The authors collected the necessary data from a field survey.

**Author contributions.** SAP was the investigator and contributed to the statistical analysis. AH and HIT contributed to the  
investigation, and involved in the statistical analysis. HMR involved in the supervision and contributed to the methodology.  
HIT prepared the manuscript with contributions from all co-authors.

390 **Competing interests.** The authors declare that they have no conflict of interest.

**Acknowledgements.** The authors wish to thank the authority of RWASA, the operational staff of public health lab, Rajshahi,  
and non-teaching staff of Rajshahi University of Engineering & Technology (RUET) for providing necessary laboratory  
395 facilities, their constant encouragement, and support. They are also highly indebted to Assistant Engineer of RWASA, Md.  
Mahbubur Rahman for the painstaking endeavour to go through the manuscript.

#### References

400 Color, taste and odor problems in drinking water, Washington State Department of Health, 2018.

Guidelines for drinking-water quality, World Health Organization (WHO), 1-540, 2004.

Turbidity and water: [https://www.usgs.gov/special-topic/water-science-school/science/turbidity-and-water?qt-science\\_center\\_objects=0#qt-science\\_center\\_objects](https://www.usgs.gov/special-topic/water-science-school/science/turbidity-and-water?qt-science_center_objects=0#qt-science_center_objects), access: 30 August, 2020.

What to know about *E. coli* infection: <https://www.medicalnewstoday.com/articles/68511>, access: 30 August, 2020, 2017.

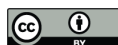

- 405 Agathokleous, A., and Christodoulou, S.: The impact of intermittent water supply policies on urban water distribution networks International Conference on Efficient & Sustainable Water Systems Management toward Worth Living Development, 2nd EWaS, 2016, 204-211,
- Akoto, O., Gyamfi, O., Darko, G., and Barnes, V. R.: Changes in water quality in the Owabi water treatment plant in Ghana, *Appl Water Sci* 7, 175-186, 10.1007/s13201-014-0232-4, 2017.
- 410 AL-Dulaimi, G. A., and Younes, M. K.: Assessment of potable water quality in Baghdad City, Iraq, *Air, Soil and Water Research*, 10, 1-5, <https://doi.org/10.1177/1178622117733441>, 2017.
- Alam, M. F., Dafader, N. C., Sultana, S., Rahman, N., and Taheri, T.: Physico-chemical analysis of the bottled drinking water available in the Dhaka City of Bangladesh *Journal of Materials and Environmental Sciences*, 8, 2076-2083, 2017.
- 415 Alom, M. M., and Habib, M. Z.: Observation of water quality and supply system in Dhaka City, Bangladesh, *IOSR Journal of Mechanical and Civil Engineering (IOSR-JMCE)*, 13, 23-27, 10.9790/1684-1303062327 2016.
- Ander, E. L., Watts, M. J., Smedley, P. L., Hamilton, E. M., Close, R., Crabbe, H., and Fletcher, T., et al.: Variability in the chemistry of private drinking water supplies and the impact of domestic treatment systems on water quality, *Environ Geochem Health*, 38, 1313–1332, <https://doi.org/10.1007/s10653-016-9798-0>, 2016.
- 420 Bari, M. N., and Sarkar, I. H.: Quality assessment of pond water in Rajshahi City, International Conference on Planning, Architecture and Civil Engineering (ICPACE), Rajshahi University of Engineering & Technology, Rajshahi, Bangladesh, 2017, 131-135,
- Benson, R., Conerly, O. D., Sander, W., Batt, A. L., Boone, J. S., Furlong, E. T., and Glassmeyer, S. T., et al.: Human health screening and public health significance of contaminants of emerging concern detected in public water supplies, *Science of The Total Environment*, 579, 1643–1648, <https://doi.org/10.1016/j.scitotenv.2016.03.146>, 2017.
- 425 Cabral, J. P. S.: Water microbiology. Bacterial pathogens and water, *Int. J. Environ. Res. Public Health*, 7, 3657-3703, <https://doi.org/10.3390/ijerph7103657>, 2010.
- Chalchisa, D., Megersa, M., and Beyene, A.: Assessment of the quality of drinking water in storage tanks and its implication on the safety of urban water supply in developing countries, *Environmental Systems Research*, 6, 12, 10.1186/s40068-017-0089-2, 2017.
- 430 Dion, L.-A., Saint-Amour, D., Sauv e, S., Barbeau, B., Mergler, D., and Bouchard, M. F.: Changes in water manganese levels and longitudinal assessment of intellectual function in children exposed through drinking water, *NeuroToxicology*, 64, 118-125, <https://doi.org/10.1016/j.neuro.2017.08.015>, 2018.
- 435 Doull, J., Andelman, J. B., Buhler, D. R., Characklis, W. G., Christman, R. F., and Cohen, S. D., et al.: Biological quality of water in the distribution system, in: *Drinking Water and Health*, Washington (DC): National Academies Press (US), National Research Council (US) Safe Drinking Water Committee, 1982.
- Douterelo, I., Jackson, M., Solomon, C., and Boxall, J.: Microbial analysis of in situ biofilm formation in drinking water distribution systems: implications for monitoring and control of drinking water quality, *Appl Microbiol Biotechnol*, 100, 3301–3311 10.1007/s00253-015-7155-3, 2016.
- 440 Edokpayi, J. N., Rogawski, E. T., Kahler, D. M., Hill, C. L., Reynolds, C., Nyathi, E., and Smith, J. A., et al.: Challenges to sustainable safe drinking water: A case study of water quality and use across seasons in rural communities in Limpopo Province, South Africa, *Water*, 10, <https://doi.org/10.3390/w10020159>, 2018.



- Ellis, K., Gowdy, C., Jakomis, N., Ryan, B., Thom, C., Biggs, C. A., and Speight, V.: Understanding the costs of investigating coliform and *E. coli* detections during routine drinking water quality monitoring, *Urban Water Journal*, 15, 101-108, <https://doi.org/10.1080/1573062X.2017.1398762>, 2018.
- 445 Erickson, J. J., Smith, C. D., Goodridge, A., and Nelson, K. L.: Water quality effects of intermittent water supply in Arraiján, Panama, *Water Research*, 114, 338-350, <https://doi.org/10.1016/j.watres.2017.02.009>, 2017.
- Etim, E. E., Odoh, R., Itodo, A. U., Umoh, S. D., and Lawal, U.: Water quality index for the assessment of water quality from different sources in the Niger Delta Region of Nigeria, *Frontiers in Science*, 3, 89-95, [10.5923/j.fs.20130303.02](https://doi.org/10.5923/j.fs.20130303.02), 2013.
- 450 Fahmida, K., Lemon, M. H. R., Islam, M. S., and Kader, M. A.: Assessment of supplied water quality of Khulna WASA of Bangladesh, *International Conference on Mechanical, Industrial and Materials Engineering (ICMIME)*, Rajshahi University of Engineering & Technology, Rajshahi, Bangladesh, 2013, 852-857,
- Falconi, T. M. A., Kulinkina, A. V., Mohan, V. R., Francis, M. R., Kattula, D., Sarkar, R., and Ward, H., et al.: Quantifying tap-to-household water quality deterioration in urban communities in Vellore, India: The impact of spatial assumptions, *International Journal of Hygiene and Environmental Health*, 220, 29-36, <https://doi.org/10.1016/j.ijheh.2016.09.019>,  
455 2017.
- Fernández-Navarro, P., Villanueva, C. M., García-Pérez, J., Boldo, E., Goñi-Irigoyen, F., Ulibarrena, E., and Rantakokko, P., et al.: Chemical quality of tap water in Madrid: multicase control cancer study in Spain (MCC-Spain), *Environ Sci Pollut Res*, 24, 4755–4764, <https://doi.org/10.1007/s11356-016-8203-y>, 2017.
- 460 Guettaf, M., Maoui, A., and Ihdene, Z.: Assessment of water quality: a case study of the Seybouse River (North East of Algeria), *Appl Water Sci*, 7, 295-307, [10.1007/s13201-014-0245-z](https://doi.org/10.1007/s13201-014-0245-z), 2017.
- Gulati, P., and Ghosh, M.: Biofilm forming ability of *Sphingomonas paucimobilis* isolated from community drinking water systems on plumbing materials used in water distribution, *Journal of Water & Health*, 15, 942-954, <https://doi.org/10.2166/wh.2017.294>, 2017.
- Hossain, M. L., Nahida, S. K. N., and Hossain, M. I.: Water quality status of recreational spots in Chittagong City, *Journal of Water Resources and Ocean Science*, 3, 38-44, [10.11648/j.wros.20140303.12](https://doi.org/10.11648/j.wros.20140303.12), 2014.
- 465 J, A., B, G., and N, S.: Drinking water quality assessment, *J Nepal Health Res Counc*, 10, 192-196, 2012.
- Jayaswal, K., Sahu, V., and Gurjar, B. R.: Water pollution, human health and remediation, in: *Water Remediation. Energy, Environment, and Sustainability*, Bhattacharya S., Gupta A., Gupta A., Pandey A. ed., Springer, Singapore, 2018.
- 470 Khan, S., Shahnaz, M., Jehan, N., Rehman, S., Shah, M. T., and Din, I.: Drinking water quality and human health risk in Charsadda district, Pakistan, *Journal of Cleaner Production*, 60, 93-101, <https://doi.org/10.1016/j.jclepro.2012.02.016>, 2013.
- Kumar, P., Masago, Y., Mishra, B. K., Jalilov, S., Emam, A. R., Kefi, M., and Fukushi, K.: Current assessment and future outlook for water resources considering climate change and a population burst: A case study of Ciliwung River, Jakarta City, Indonesia, *Water*, 9, <https://doi.org/10.3390/w9060410>, 2017.
- 475 Lee, J.-Y., Kwon, K. D., and Raza, M.: Current water uses, related risks, and management options for Seoul megacity, Korea, *Environmental Earth Sciences*, 77, <https://doi.org/10.1007/s12665-017-7192-6>, 2018.



- Liu, G., Zhang, Y., Knibbe, W.-J., Feng, C., Liu, W., Medema, G., and Meer, W. v. d.: Potential impacts of changing supply-water quality on drinking water distribution: A review, *Water Research*, 116, 135-148, <https://doi.org/10.1016/j.watres.2017.03.031>, 2017a.
- 480 Liu, J., Ren, H., Ye, X., Wang, W., Liu, Y., Lou, L., and Cheng, D., et al.: Bacterial community radial-spatial distribution in biofilms along pipe wall in chlorinated drinking water distribution system of East China, *Appl Microbiol Biotechnol* 101, 749–759, <https://doi.org/10.1007/s00253-016-7887-8>, 2017b.
- Liu, Z.-h., Yin, H., and Dang, Z.: Do estrogenic compounds in drinking water migrating from plastic pipe distribution system pose adverse effects to human? An analysis of scientific literature, *Environ Sci Pollut Res*, 24, 2126–2134, 485 <https://doi.org/10.1007/s11356-016-8032-z>, 2017c.
- Liyanage, C. P., and Yamada, K.: Impact of population growth on the water quality of natural water bodies, sustainability, 9, <https://doi.org/10.3390/su9081405>, 2017.
- Mangi, S. A., Sohu, S., Soomro, F. A., Abdullah, A. H., and Nagapan, S.: Assessment of Physicochemical parameters for the drinking water quality in the vicinity of Nawabshah City, Sindh, Pakistan, *ENGINEERING SCIENCE AND* 490 *TECHNOLOGY INTERNATIONAL RESEARCH JOURNAL*, 1, 10-14, 2017.
- Martínez-Santos, P., Martín-Loeches, M., García-Castro, N., Solera, D., Díaz-Alcaide, S., Montero, E., and García-Rincón, J.: A survey of domestic wells and pit latrines in rural settlements of Mali: Implications of on-site sanitation on the quality of water supplies, *International Journal of Hygiene and Environmental Health*, 220, 1179-1189, <https://doi.org/10.1016/j.ijheh.2017.08.001>, 2017.
- 495 Memon, M., Soomro, M. S., Akhtar, M. S., and Memon, K. S.: Drinking water quality assessment in Southern Sindh (Pakistan), *Environ Monit Assess*, 177, 39-50, <https://doi.org/10.1007/s10661-010-1616-z>, 2011.
- Oyem, H. H., Oyem, I. M., and Ezeweali, D.: Temperature, pH, electrical conductivity, total dissolved solids and chemical oxygen demand of groundwater in Boji-BojiAgbor/Owa area and immediate suburbs, *Resrch Jounl of Environtal Science*, 444-450, 103923/rjes.2014, 2014.
- 500 Power, K. N., and Nagy, L. A.: Relationship between bacterial regrowth and some physical and chemical parameters within Sydney's drinking water distribution system, *Water Research*, 33, 741-750, [https://doi.org/10.1016/S0043-1354\(98\)00251-6](https://doi.org/10.1016/S0043-1354(98)00251-6), 1999.
- Rahman, M. M.: Surface water quality in Rajshahi City, *The Journal of Geo-Environment*, 4, 15-22, 2004.
- 505 Robinne, F.-N., Bladon, K. D., Miller, C., Parisien, M.-A., Mathieu, J., and Flannigan, M. D.: A spatial evaluation of global wildfire-water risks to human and natural systems, *Science of The Total Environment*, 610-611, 1193–1206, <https://doi.org/10.1016/j.scitotenv.2017.08.112>, 2018.
- Sharif, M. N., Farahat, A., Haider, H., Al-Zahrani, M. A., Rodriguez, M. J., and Sadiq, R.: Risk-based framework for optimising residual chlorine in large water distribution systems, *Environ Monit Assess*, 189, <https://doi.org/10.1007/s10661-017-5989-0>, 2017.
- 510 Shigut, D. A., Liknew, G., Irge, D. D., and Ahmad, T.: Assessment of physico-chemical quality of borehole and spring water sources supplied to Robe Town, Oromia region, Ethiopia, *Appl Water Sci*, 7, 155-164, [10.1007/s13201-016-0502-4](https://doi.org/10.1007/s13201-016-0502-4), 2017.



- Vairavamoorthy, K., Yan, J., Galgale, H. M., and Gorantiwar, S. D.: IRA-WDS: A GIS-based risk analysis tool for water distribution systems, *Environmental Modelling & Software*, 22, 951-965, <https://doi.org/10.1016/j.envsoft.2006.05.027>, 2007.
- 515 Wang, F., Li, W., Li, Y., Zhang, J., Chen, J., Zhang, W., and Wu, X.: Molecular analysis of bacterial community in the tap water with different water ages of a drinking water distribution system, *Front. Environ. Sci. Eng.*, 12, <https://doi.org/10.1007/s11783-018-1020-4>, 2018.
- Zhang, C., Li, C., Zheng, X., Zhao, J., He, G., and Zhang, T.: Effect of pipe materials on chlorine decay, trihalomethanes formation, and bacterial communities in pilot-scale water distribution systems, *Int. J. Environ. Sci. Technol.*, 14, 85-94, <https://doi.org/10.1007/s13762-016-1104-2>, 2017.
- 520 Zhou, X., Zhang, K., Zhang, T., Li, C., and Mao, X.: An ignored and potential source of taste and odor (T & O) issues-biofilms in drinking water distribution system (DWDS), *Appl Microbiol Biotechnol* 101, 3537–3550, <https://doi.org/10.1007/s00253-017-8223-7>, 2017.
